# Supplementary material
Source: Springer Nature journal article supplement (https://www.springermedizin.de/resource/supplementary/12986_2010_271_MOESM5_ESM.pdf/25655726)

A

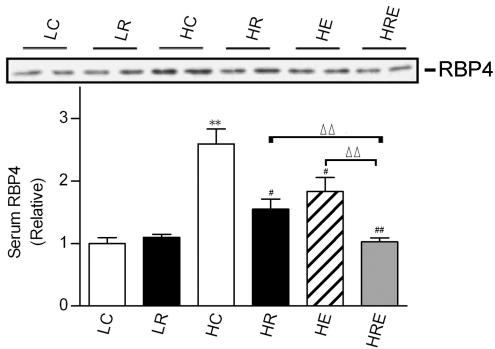

B

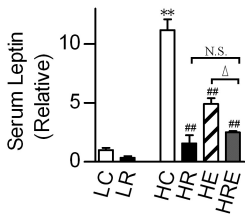

C

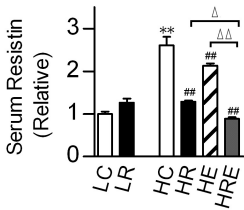

Supplement: MOESM5 [file 25655726]
